# Supplementary material for: Dual-Crosslinking of Gelatin-Based Hydrogels: Promising Compositions for a 3D Printed Organotypic Bone Model
Source: MDPI journal article supplement (doi:10.3390/bioengineering10060704), 2023-06-09
Supplement: s1 [file s1]

Supplementary Materials

# Dual-Crosslinking of Gelatin-Based Hydrogels: Promising Compositions for a 3D Printed Organotypic Bone Model

Ahmer Shehzad, Fariza Mukasheva, Muhammad Moazzam, Dana Sultanova, Birzhan Abdikhan, Alexander Trifonov and Dana Akilbekova \*

Department of Chemical Engineering, School of Engineering and Digital Sciences, Nazarbayev University, 010000 Astana, Kazakhstan

\* Correspondence: dana.akilbekova@nu.edu.kz

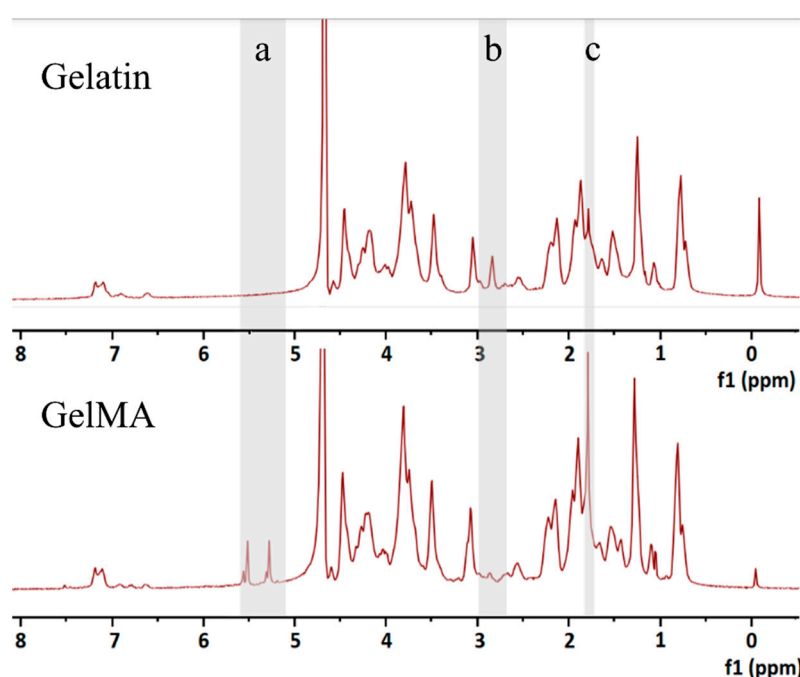

**Figure S1.**  $^1\text{H}$  Nuclear Magnetic Resonance spectra of gelatin and gelatin methacrylate (GelMA). The highlighted region: (a) 5.3 and 5.52 ppm correspond to the protons of the methacrylate vinyl group, (b) 2.82 ppm corresponds to the methylene of lysine's side chain, (c) 1.75 ppm corresponds to the substitution of amino groups by methyl protons of methacryloyl.

**Table S1.** Optical images of variable gelatin/gelatin methacrylate (GelMA) ratios. Representative printing fidelity (PF) of the scaffolds 10 minutes after the printing.

| Gelatin<br>w/v% | GelMA<br>w/v%                                                                       |                                                                                       |                                                                                       |
|-----------------|-------------------------------------------------------------------------------------|---------------------------------------------------------------------------------------|---------------------------------------------------------------------------------------|
|                 | 2.5                                                                                 | 5                                                                                     | 10                                                                                    |
| 0               | Not Printable                                                                       | Not Printable                                                                         | 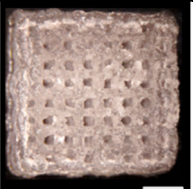   |
| 2               |    |    |    |
| 4               |   |   |   |
| 6               |  |  |  |
| 8               |  |  | Not Printable                                                                         |

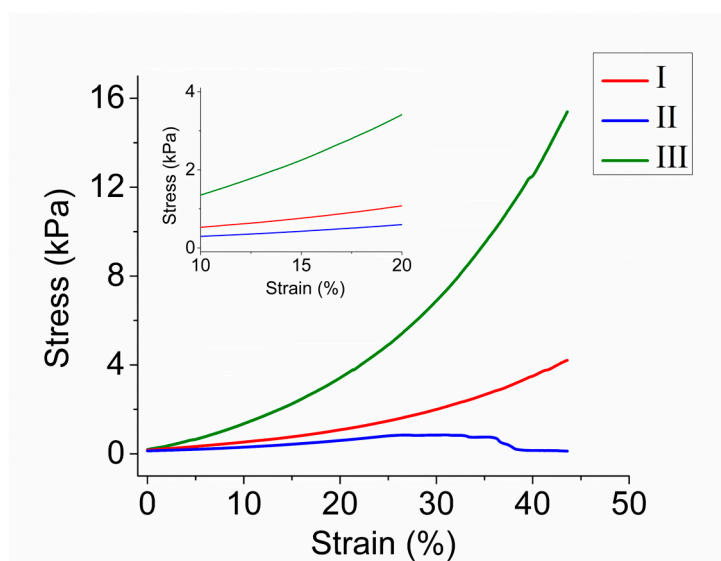

**Figure S2.** Averaged stress-strain behavior of the respective scaffolds (I, II, and III). All scaffolds were subjected to a strain of up to 44%. Inset: magnified region, from which compressive moduli were calculated. N = 4 for each scaffold.
